# Supplementary material
Source: PubMed Central journal article supplement (PMC6437538)
Supplement: AAC.02526-18-s0001.pdf [file AAC.02526-18-s0001.pdf]

## **Supplementary Tables**

Table S1. Known AbaRs collected by this study.

Table S2. Insertion sites of AbaRs.

## **Supplementary Figures**

Figure S1. Flow diagram for *in silico* identification of AbaRs.

Figure S2. Abundance of AbaRs in different *Acinetobacter baumannii* sequence types (STs) of the Oxford scheme.

Figure S3. Examples of target site duplication generated by AbaR insertion.

## **Supplementary Datasets**

Dataset S1. *Acinetobacter baumannii* genomes used in this study.

Dataset S2. AbaR conserved sequence hits in *Acinetobacter baumannii* genomes

Dataset S3. AbaR conserved sequence hits in non-*Acinetobacter baumannii* species

Dataset S4. Intact AbaRs identified from complete and draft genomes

Dataset S5. *Acinetobacter baumannii* plasmids sequenced alone.

Table S1. Known AbaRs collected by this study.

| AbaR                  | Strain                                 | Accession No. | Location                 | Size (bp) | GC content | Insertion site | Flanking DR | Ref. |
|-----------------------|----------------------------------------|---------------|--------------------------|-----------|------------|----------------|-------------|------|
| Tn6019 <sup>a</sup>   | <i>A. baumannii</i> 3208               | FJ172370      | 27587-39905, 79885-83897 | 16332     | 37.77%     | <i>comM</i>    | ACCGC       | (1)  |
| Tn6021                | <i>A. baumannii</i> ATCC 17978         | CP000521      | 230361-243463            | 13103     | 35.85%     | <i>comM</i>    | ACCGC       | (1)  |
| Tn6022 <sup>b</sup>   | <i>A. baumannii</i> D36                | JN107991      | 41312-51082, 55897-58123 | 11998     | 36.06%     | <i>comM</i>    | ACCGC       | (2)  |
| Tn6022Δ1 <sup>c</sup> | <i>A. baumannii</i> A320 (RUH134)      | JN247441      | 30419-39566              | 9148      | 35.76%     | <i>comM</i>    | -           | (3)  |
| Tn6022Δ1 <sup>d</sup> | <i>A. nosocomialis</i> H06-681         | KP888561      | 53-9200                  | 9148      | 35.71%     | <i>comM</i>    | ACCGC       | (4)  |
| Tn6022Δ1 <sup>e</sup> | <i>A. seifertii</i> C066               | KP888562      | 43-9190                  | 9148      | 35.71%     | <i>comM</i>    | ACCGC       | (4)  |
| Tn6022Δ1 <sup>f</sup> | <i>A. baumannii</i> A9380              | JX844629      | 99-9246                  | 9148      | 35.71%     | <i>comM</i>    | ACCGC       |      |
| Tn6022Δ1 <sup>g</sup> | <i>A. baumannii</i> A50841             | JF330267      | 416-9558                 | 9143      | 35.81%     | <i>comM</i>    | ACCGC       |      |
| AbaR0                 | <i>A. baumannii</i> WM98               | KF483599      | 26869-90504              | 63636     | 52.24%     | <i>comM</i>    | ACCGC       | (5)  |
| AbaR1                 | <i>A. baumannii</i> AYE                | CT025832      | 6496-92739               | 86244     | 52.80%     | <i>comM</i>    | ACCGC       | (6)  |
| AbaR2 <sup>h</sup>    | <i>A. baumannii</i> ACICU              | CP000863      | 248016-264298            | 16283     | 51.52%     | <i>comM</i>    | ACCGC       | (7)  |
| AbaR3                 | <i>A. baumannii</i> AB0057             | CP001182      | 263572-326560            | 62989     | 52.20%     | <i>comM</i>    | ACCGC       | (8)  |
| AbaR3                 | <i>A. baumannii</i> A85                | KC118540      | 47072-110060             | 62989     | 52.20%     | <i>comM</i>    | ACCGC       | (9)  |
| AbaR4                 | <i>A. baumannii</i> AB0057             | CP001182      | 582394-599202            | 16809     | 36.27%     | <i>pho</i>     | TCAGT       | (8)  |
| AbaR4                 | <i>A. baumannii</i> D36                | JN107991      | 41312-58123              | 16812     | 36.27%     | <i>comM</i>    | ACCGC       | (2)  |
| AbaR4                 | <i>A. baumannii</i> A85 plasmid pA85-3 | KJ493819      | 39244-56049              | 16806     | 36.26%     | -              | CCATT       | (9)  |
| AbaR4                 | <i>A. nosocomialis</i> E09-34          | KP888559      | 40-16851                 | 16812     | 36.27%     | <i>comM</i>    | ACCGC       | (4)  |
| AbaR4                 | <i>A. nosocomialis</i> H09-1045        | KP888560      | 99-16910                 | 16812     | 36.27%     | <i>comM</i>    | ACCGC       | (4)  |
| AbaR4a <sup>i</sup>   | <i>A. baumannii</i> LT-3               | JN129845      | 263-17892                | 17630     | 40.83%     | <i>comM</i>    | ACCGC       | (10) |
| AbaR4b <sup>j</sup>   | <i>A. baumannii</i> LT-11              | JN129846      | -                        | -         | -          | <i>comM</i>    | -           | (10) |
| AbaR4c <sup>j</sup>   | <i>A. baumannii</i> LT-V1              | JN129847      | -                        | -         | -          | <i>comM</i>    | -           | (10) |
| AbaR4d                | <i>A. baumannii</i> 1656-2             | CP001921      | 257773-291760            | 33988     | 40.20%     | <i>comM</i>    | ACCGC       | (10) |

|                        |                                   |              |               |       |        |             |       |      |
|------------------------|-----------------------------------|--------------|---------------|-------|--------|-------------|-------|------|
| AbaR4e                 | <i>A. baumannii</i> TCDC-AB0715   | CP002522     | 246596-296176 | 49581 | 48.48% | <i>comM</i> | ACCGC | (10) |
| AbaR5                  | <i>A. baumannii</i> 3208          | FJ172370     | 27587-83897   | 56311 | 52.49% | <i>comM</i> | ACCGC | (11) |
| AbaR6                  | <i>A. baumannii</i> D2            | GQ406245     | 28298-55689   | 27392 | 47.74% | <i>comM</i> | ACCGC | (1)  |
| AbaR7                  | <i>A. baumannii</i> A92           | GQ406246     | 755-20422     | 19668 | 50.88% | <i>comM</i> | ACCGC | (1)  |
| AbaR8                  | <i>A. baumannii</i> D13           | HM590877     | 28552-73689   | 45138 | 50.97% | <i>comM</i> | ACCGC | (12) |
| AbaR9 <sup>j</sup>     | <i>A. baumannii</i> AB056         | ADGZ00000000 | -             | -     | -      | <i>comM</i> | -     | (13) |
| AbaR10 <sup>j</sup>    | <i>A. baumannii</i> AB058         | ADHA00000000 | -             | -     | -      | <i>comM</i> | -     | (13) |
| AbaR10 <sup>j</sup>    | <i>A. baumannii</i> NIPH56        | JF262165     | -             | -     | -      | <i>comM</i> | -     | (14) |
| AbaR10 <sup>j</sup>    | <i>A. baumannii</i> NIPH783       | JF262166     | -             | -     | -      | <i>comM</i> | -     | (14) |
| AbaR11 <sup>j</sup>    | <i>A. baumannii</i> NIPH470       | JF262167     | -             | -     | -      | <i>comM</i> | -     | (14) |
| AbaR12 <sup>j</sup>    | <i>A. baumannii</i> LUH6013       | JF262168     | -             | -     | -      | <i>comM</i> | -     | (14) |
| AbaR13 <sup>j</sup>    | <i>A. baumannii</i> LUH6015       | JF262169     | -             | -     | -      | <i>comM</i> | -     | (14) |
| AbaR14 <sup>j</sup>    | <i>A. baumannii</i> LUH5881       | JF262170     | -             | -     | -      | <i>comM</i> | -     | (14) |
| AbaR15 <sup>j</sup>    | <i>A. baumannii</i> LUH6125       | JF262171     | -             | -     | -      | <i>comM</i> | -     | (14) |
| AbaR16 <sup>j</sup>    | <i>A. baumannii</i> LUH7140       | JF262172     | -             | -     | -      | <i>comM</i> | -     | (14) |
| AbaR17 <sup>j</sup>    | <i>A. baumannii</i> LUH8592       | JF262173     | -             | -     | -      | <i>comM</i> | -     | (14) |
| AbaR18 <sup>j</sup>    | <i>A. baumannii</i> NIPH2713      | JF262174     | -             | -     | -      | <i>comM</i> | -     | (14) |
| AbaR19 <sup>j</sup>    | <i>A. baumannii</i> NIPH2554      | JF262175     | -             | -     | -      | <i>comM</i> | -     | (14) |
| AbaR20 <sup>j</sup>    | <i>A. baumannii</i> NIPH2665      | JF262178     | -             | -     | -      | <i>comM</i> | -     |      |
| AbaR302 <sup>j,k</sup> | <i>A. baumannii</i> HK302         | HM357806     | -             | -     | -      | <i>comM</i> | -     | (15) |
| AbaR21                 | <i>A. baumannii</i> A297 (RUH875) | KM921776     | 754-62030     | 61277 | 52.08% | <i>comM</i> | ACCGC | (16) |
| AbaR22                 | <i>A. baumannii</i> MDR-ZJ06      | CP001937     | 255471-294153 | 38683 | 37.77% | <i>comM</i> | ACCGC | (17) |
| AbaR23                 | <i>A. baumannii</i> D81           | JN409449     | 34344-85159   | 50816 | 52.42% | <i>comM</i> | ACCGC |      |
| AbaR24                 | <i>A. baumannii</i> A1            | CP010781     | 252007-304766 | 52760 | 52.49% | <i>comM</i> | ACCGC | (18) |
| AbaR25                 | <i>A. baumannii</i> K51-65        | JX481978     | 417-46885     | 46469 | 38.29% | <i>comM</i> | ACCGC | (19) |

|                       |                                   |          |                 |       |        |                    |       |      |
|-----------------------|-----------------------------------|----------|-----------------|-------|--------|--------------------|-------|------|
| ΔAbaR25               | <i>A. baumannii</i> K51-74        | JX481979 | 417-41063       | 40647 | 37.75% | <i>comM</i>        | ACCGC | (19) |
| AbaR26 <sup>l</sup>   | <i>A. baumannii</i> D30           | KC665626 | 1610-20270      | 18661 | 51.77% | <i>comM</i>        | ACCGC |      |
| AbaR25 <sup>m</sup>   | <i>A. baumannii</i> BJAB07104     | CP003846 | 264350-307196   | 42847 | 38.37% | <i>comM</i>        | ACCGC | (20) |
| AbaR26 <sup>n</sup>   | <i>A. baumannii</i> BJAB0868      | CP003849 | 261295-302950   | 41656 | 38.45% | <i>comM</i>        | ACCGC | (20) |
| AbaR27                | <i>A. baumannii</i> BJAB0715      | CP003847 | 2986232-3001620 | 15389 | 44.04% | <i>ACICU_02698</i> | CCAAC | (20) |
| TnAbaR23 <sup>o</sup> | <i>A. baumannii</i> A424          | JN676148 | 2901-51246      | 48346 | 52.31% | <i>comM</i>        | ACCGC | (21) |
| Tn6166 <sup>p</sup>   | <i>A. baumannii</i> A320 (RUH134) | JN247441 | 30419-48048     | 17630 | 40.85% | <i>comM</i>        | ACCGC | (3)  |
| Tn6167                | <i>A. baumannii</i> A91           | JN968483 | 29721-66788     | 37068 | 39.57% | <i>comM</i>        | ACCGC | (22) |
| Tn6168 <sup>q</sup>   | <i>A. baumannii</i> A9337         | JX844630 | 89-42979        | 42891 | 38.39% | <i>comM</i>        | ACCGC | (23) |
| RI <sub>AB210</sub>   | <i>A. baumannii</i> AB210         | HQ700358 | 135-14096       | 13962 | 36.12% | <i>comM</i>        | ACCGC | (24) |
| RI <sub>MDR-TJ</sub>  | <i>A. baumannii</i> MDR-TJ        | CP003500 | 3672761-3714403 | 41643 | 38.45% | <i>comM</i>        | ACCGC | (25) |
| RI <sub>TYTH-1</sub>  | <i>A. baumannii</i> TYTH-1        | CP003856 | 475548-517205   | 41658 | 38.47% | <i>comM</i>        | ACCGC | (26) |

DR, direct repeat. DRs are given in accord with the orientation of the *tni* transposase genes. Ref., reference.

<sup>a</sup> Represented by the AbaR5 backbone.

<sup>b</sup> Represented by the AbaR4 backbone.

<sup>c</sup> Represented as defined in Tn6166.

<sup>d</sup> Called ‘Tn6022’ in the GenBank entry, but renamed here as being 99% identical to the published Tn6022Δ1 (GeneBank accession number: JN247441).

<sup>e</sup> Called ‘Tn6022’ in the GenBank entry, but renamed here as being 99% identical to the published Tn6022Δ1 (GeneBank accession number: JN247441).

<sup>f</sup> Called ‘Tn6022Δ2’ in the GenBank entry, but renamed here as being 99% identical to the published Tn6022Δ1 (GeneBank accession number: JN247441).

<sup>g</sup> Called ‘Tn6021’ in the GenBank entry, but renamed here as being 99% identical to the published Tn6022Δ1 (GeneBank accession number: JN247441).

<sup>h</sup> AbaR2 is not intact with the left-hand end missing.

<sup>i</sup> Also appeared as ‘TnAbaR4a’ in the GenBank entry.

<sup>j</sup> Partially sequenced.

<sup>k</sup> Named by this study since no name had been given before.

<sup>l</sup> AbaR26 (*A. baumannii* D30) is not intact with the left-hand end missing.

<sup>m</sup> Different to the AbaR25 defined in *A. baumannii* K51-65.

<sup>n</sup> Different to the AbaR26 defined in *A. baumannii* D30.

<sup>o</sup> Different to AbaR23.

<sup>p</sup> Also called AbGRI1-1.

<sup>q</sup> The element was named Tn6168 in the GenBank entry, but is totally different to the published Tn6168 defined in *A. baumannii* A85 (GenBank accession number: KC118540) (27).

Table S2. Insertion sites of AbaRs.

| Locus                                         | Origin            | <u>Left DR</u><br>sequence/<br>5-bp flank<br>(5'-3') | <u>Right DR</u><br>sequence/<br>5-bp flank<br>(5'-3') | Left<br>splitting<br>part<br>found | Right<br>splitting<br>part<br>found |
|-----------------------------------------------|-------------------|------------------------------------------------------|-------------------------------------------------------|------------------------------------|-------------------------------------|
| <i>comM</i> (c836-840)                        | chromosome        | <u>ACCGC</u>                                         | <u>ACCGC</u>                                          | 1790                               | 1890                                |
| <i>comM</i> (mutation of ACCGC)               | chromosome        | <u>GCCGC</u>                                         | <u>GCCGC</u>                                          | 5                                  | 5                                   |
| <i>comM</i> (c836-840/c684-688)               | chromosome        | ACCGC                                                | GTGAG                                                 | 1                                  | 1                                   |
| <i>comM</i> (c830-834)                        | chromosome        | -                                                    | CCCAA                                                 | 0                                  | 6                                   |
| <i>comM</i> (c836-840/c833-837)               | chromosome        | ACCGC                                                | GCCCC                                                 | 1                                  | 1                                   |
| <i>comM</i> (c835-839)                        | chromosome        | -                                                    | CCGCC                                                 | 0                                  | 1                                   |
| <i>comM</i> (c836-840/c838-842)               | chromosome        | ACCGC                                                | CGCCC                                                 | 1                                  | 4                                   |
| <i>comM</i> (c1316-1320)                      | chromosome        | ACTAT                                                | -                                                     | 1                                  | 0                                   |
| pAB3-type locus 2                             | plasmid           | <u>AGAAT</u>                                         | <u>AGAAT</u>                                          | 891                                | 79                                  |
| <i>tetA</i> (B)                               | transposon        | <u>ACTTG</u>                                         | <u>ACTTG</u>                                          | 555                                | 1268                                |
| <i>tetA</i> (B) (mutation of ACTTG)           | transposon        | CCTTG                                                | -                                                     | 1                                  | 0                                   |
| <i>acoA</i>                                   | chromosome        | <u>CGATC</u>                                         | <u>CGATC</u>                                          | 72                                 | 53                                  |
| pAB3-type locus 1                             | plasmid           | <u>ATTAT</u>                                         | <u>ATAGT</u>                                          | 40                                 | 720                                 |
| <i>B7L39_18880</i>                            | plasmid           | <u>CCATT</u>                                         | <u>CCATT</u>                                          | 23                                 | 19                                  |
| <i>pho</i>                                    | chromosome        | <u>TCAGT</u>                                         | <u>TCAGT</u>                                          | 14                                 | 19                                  |
| <i>uup</i>                                    | chromosome        | <u>CCTGA</u>                                         | <u>CCTGA</u>                                          | 14                                 | 14                                  |
| <i>CBI29_04511-04512</i> IGR 2                | plasmid           | <u>TCCAC</u>                                         | <u>TCCAC</u>                                          | 13                                 | 14                                  |
| <i>AB57_05270</i>                             | prophage          | <u>CTCGT</u>                                         | <u>CTCGT</u>                                          | 12                                 | 8                                   |
| <i>D721_p10064</i>                            | plasmid           | <u>AATTG</u>                                         | <u>AATTG</u>                                          | 10                                 | 10                                  |
| <i>ACICU_02698/ABR2091_27</i><br><i>29</i>    | chromosome        | <u>CCAAC</u>                                         | <u>CCAAC</u>                                          | 6                                  | 6                                   |
| <i>ABR2091_0476</i>                           | chromosome        | GTGTT                                                | -                                                     | 3                                  | 0                                   |
| <i>pilT</i> (511-507)                         | chromosome        | <u>TGCAG</u>                                         | <u>TGCAG</u>                                          | 3                                  | 3                                   |
| <i>pip7-thrC</i> IGR                          | chromosome        | <u>GCTGT</u>                                         | <u>GCTGT</u>                                          | 3                                  | 3                                   |
| <i>CBI29_04511-04512</i> IGR 1                | plasmid           | <u>GTTTA</u>                                         | <u>GTTTA</u>                                          | 3                                  | 3                                   |
| <i>ABR2091_0006-0007</i> IGR                  | chromosome        | <u>CTGTG</u>                                         | <u>CTGTG</u>                                          | 3                                  | 3                                   |
| <i>ABR2091_3231-tRNA<sup>Arg</sup></i><br>IGR | chromosome        | <u>AGATT</u>                                         | <u>AGATT</u>                                          | 3                                  | 2                                   |
| <i>ate</i>                                    | chromosome        | <u>GCAGA</u>                                         | <u>GCAGA</u>                                          | 2                                  | 2                                   |
| <i>garD</i>                                   | chromosome        | <u>TCCGC</u>                                         | <u>TCCGC</u>                                          | 2                                  | 2                                   |
| <i>ABR2091_0103</i>                           | chromosome        | <u>CTTGG</u>                                         | <u>CTTGG</u>                                          | 2                                  | 2                                   |
| <i>ABR2091_3495</i> (c1463-<br>1367)          | chromosome        | <u>ACCAC</u>                                         | <u>ACCAC</u>                                          | 2                                  | 2                                   |
| GI sequence                                   | genomic<br>island | <u>TCCAC</u>                                         | <u>TCCAC</u>                                          | 2                                  | 2                                   |
| <i>mucK</i>                                   | chromosome        | <u>CCTAT</u>                                         | <u>CCTAT</u>                                          | 2                                  | 2                                   |
| <i>ompW</i>                                   | chromosome        | <u>GTAGA</u>                                         | <u>GTAGA</u>                                          | 2                                  | 2                                   |

|                                        |                   |              |              |   |   |
|----------------------------------------|-------------------|--------------|--------------|---|---|
| <i>B7L39_18740</i>                     | plasmid           | <u>GTCG</u>  | <u>GTCG</u>  | 2 | 3 |
| <i>umuC</i> (935-939)                  | plasmid           | <u>ATAAG</u> | <u>ATAAG</u> | 2 | 2 |
| <i>M3Q_1446</i>                        | prophage          | CTGTC        | -            | 2 | 0 |
| <i>recR-rnd</i> IGR                    | chromosome        | <u>CCGAG</u> | <u>CCGAG</u> | 2 | 2 |
| sequence similar to<br><i>AIS_2017</i> |                   | CCATT        | -            | 2 | 0 |
| <i>amt</i>                             | chromosome        | TCCAA        | -            | 1 | 0 |
| <i>btuE</i>                            | chromosome        | <u>CTAAT</u> | <u>CTAAT</u> | 1 | 1 |
| <i>clpA</i>                            | chromosome        | <u>GCCCA</u> | <u>GCCCA</u> | 1 | 1 |
| <i>cobS</i>                            | chromosome        | <u>AAGAC</u> | <u>AAGAC</u> | 1 | 1 |
| <i>ABR2091_0137</i>                    | chromosome        | <u>TTACC</u> | <u>TTACC</u> | 1 | 1 |
| <i>ABR2091_0220</i>                    | chromosome        | CATGC        | -            | 1 | 0 |
| <i>ABR2091_1099</i>                    | chromosome        | <u>CATTG</u> | <u>CATTG</u> | 1 | 1 |
| <i>ABR2091_1103</i>                    | chromosome        | <u>TTCAG</u> | <u>TTCAG</u> | 1 | 1 |
| <i>ABR2091_1132</i>                    | chromosome        | <u>ATTAT</u> | <u>ATTAT</u> | 1 | 1 |
| <i>ABR2091_1139</i>                    | chromosome        | <u>ACGTG</u> | <u>ACGTG</u> | 1 | 1 |
| <i>ABR2091_1254</i>                    | chromosome        | <u>CTTAC</u> | <u>CTTAC</u> | 1 | 1 |
| <i>ABR2091_1418</i>                    | chromosome        | <u>CCAGA</u> | <u>CCAGA</u> | 1 | 1 |
| <i>ABR2091_1901</i>                    | chromosome        | <u>TACAT</u> | <u>TACAT</u> | 1 | 1 |
| <i>ABR2091_1931</i>                    | chromosome        | <u>CACAT</u> | <u>CACAT</u> | 1 | 1 |
| <i>ABR2091_2130</i>                    | chromosome        | <u>CTTAT</u> | <u>CTTAT</u> | 1 | 1 |
| <i>ABR2091_3010</i>                    | chromosome        | <u>GTTAG</u> | <u>GTTAG</u> | 1 | 1 |
| <i>ABR2091_3384</i>                    | chromosome        | <u>CCACC</u> | <u>CCACC</u> | 1 | 1 |
| <i>ABR2091_3495</i> (c833-837)         | chromosome        | <u>TTGGT</u> | <u>TTGGT</u> | 1 | 1 |
| <i>ABR2091_3577</i>                    | chromosome        | <u>TTTGA</u> | <u>TTTGA</u> | 1 | 1 |
| <i>AB57_0815</i>                       | genomic<br>island | <u>ACGAT</u> | <u>ACGAT</u> | 1 | 1 |
| <i>AB57_1275</i>                       | genomic<br>island | <u>GAGGC</u> | <u>GAGGC</u> | 1 | 1 |
| <i>gloB</i> (5'-end)                   | chromosome        | <u>AATGC</u> | <u>AATGC</u> | 1 | 1 |
| <i>gutB3</i>                           | chromosome        | <u>TTCAG</u> | <u>TTCAG</u> | 1 | 1 |
| <i>ISAbal</i> (c1162-1166)             | <i>ISAbal</i>     | AATTT        | -            | 1 | 0 |
| <i>ISAbal</i> (c419-423)               | <i>ISAbal</i>     | <u>GTATC</u> | <u>GTATC</u> | 1 | 2 |
| likely plasmid-borne region<br>2       | plasmid           | <u>TCTAT</u> | <u>TCTAT</u> | 1 | 2 |
| <i>oprD</i>                            | chromosome        | <u>CCAGC</u> | <u>CCAGC</u> | 1 | 1 |
| <i>pilS</i>                            | chromosome        | <u>CCAAG</u> | <u>CCAAG</u> | 1 | 1 |
| <i>pilT</i> (1039-1043)                | chromosome        | <u>CGTTT</u> | <u>CGTTT</u> | 1 | 1 |
| <i>Aba10324_18325</i>                  | plasmid           | <u>TTTAT</u> | <u>TTTAT</u> | 1 | 1 |
| <i>Aba9102_19180</i> (6-10)            | plasmid           | <u>ATTGC</u> | <u>ATTGC</u> | 1 | 1 |
| <i>Aba9102_19180</i> (745-749)         | plasmid           | <u>TCTAC</u> | <u>TCTAC</u> | 1 | 1 |
| <i>B7L39_19070</i>                     | plasmid           | <u>TTAAG</u> | <u>TTAAG</u> | 1 | 1 |
| <i>BSF95_05010</i>                     | plasmid           | <u>CTTGA</u> | <u>CTTGA</u> | 1 | 1 |

|                              |                |              |              |   |   |
|------------------------------|----------------|--------------|--------------|---|---|
| <i>KAB01_03881</i>           | plasmid        | <u>CTGAT</u> | <u>CTGAT</u> | 1 | 1 |
| <i>repA</i>                  | plasmid        | <u>ATTAC</u> | <u>ATTAC</u> | 1 | 1 |
| <i>ACX61_19590-19595</i> IGR | plasmid        | <u>GCCTT</u> | <u>GCCTT</u> | 1 | 1 |
| <i>umuC</i> (1129-1133)      | plasmid        | <u>CAAGA</u> | <u>CAAGA</u> | 1 | 2 |
| <i>AB57_0986-0987</i> IGR    | genomic island | <u>ATGAC</u> | <u>ATGAC</u> | 1 | 1 |
| <i>ABR2091_0111-0112</i> IGR | chromosome     | ATTAT        | -            | 1 | 0 |
| <i>ABR2091_1794-1795</i> IGR | chromosome     | CTTTT        | -            | 1 | 0 |
| <i>ABR2091_3550-3551</i> IGR | chromosome     | <u>GCTAT</u> | <u>GCTAT</u> | 1 | 1 |
| <i>styA</i>                  | chromosome     | <u>CTTCT</u> | <u>CTTCT</u> | 1 | 1 |
| <i>tnpA</i>                  | Tn1000-like    | <u>CCCAG</u> | <u>CCCAG</u> | 1 | 1 |
| <i>topA</i>                  | chromosome     | <u>TTCAG</u> | <u>TTCAG</u> | 1 | 1 |
| <i>uvrA/drrC</i>             | chromosome     | <u>ACAAT</u> | <u>ACAAT</u> | 1 | 1 |
| <i>ybaL</i>                  | chromosome     | <u>CCCCT</u> | <u>CCCCT</u> | 1 | 1 |
| <i>ychJ</i>                  | chromosome     | <u>TTTAG</u> | <u>TTTAG</u> | 1 | 1 |
| <i>ABR2091_0123</i>          | chromosome     | -            | GGTGA        | 0 | 2 |
| <i>ABR2091_2957</i>          | chromosome     | -            | ATGGC        | 0 | 2 |
| <i>ISAbal</i> (712-716)      | <i>ISAbal</i>  | -            | GATTT        | 0 | 3 |
| <i>B7L39_18670</i>           | plasmid        | -            | TTCTA        | 0 | 1 |
| repeat region                | plasmid        | -            | TTTTG        | 0 | 1 |
| <i>strA</i>                  | Tn5393         | -            | CCAAT        | 0 | 1 |

For a name-unassigned gene, a representative locus tag identifier of an identical undisrupted gene is given. IGR, intergenic region. If there are two insertion sites in one gene or one IS, the positions of the corresponding DR sequences are given in brackets for distinction and the letter “c” means complement where applicable. The *comM* gene is considered as one insertion with variations at the right splitting part. The locus used to be represented by *ACICU\_02698* is tagged with *ABR2091\_2729* here to be consistent with other chromosomal loci. The *B7L39\_18880* corresponds to the locus having been reported on pA85-3. The pAB3-type locus 1 and pAB3-type locus 2 correspond to the ones seen to be disrupted by Tn6021 and Tn6174, respectively, on plasmid pAB3. The direct repeat sequences are underlined.



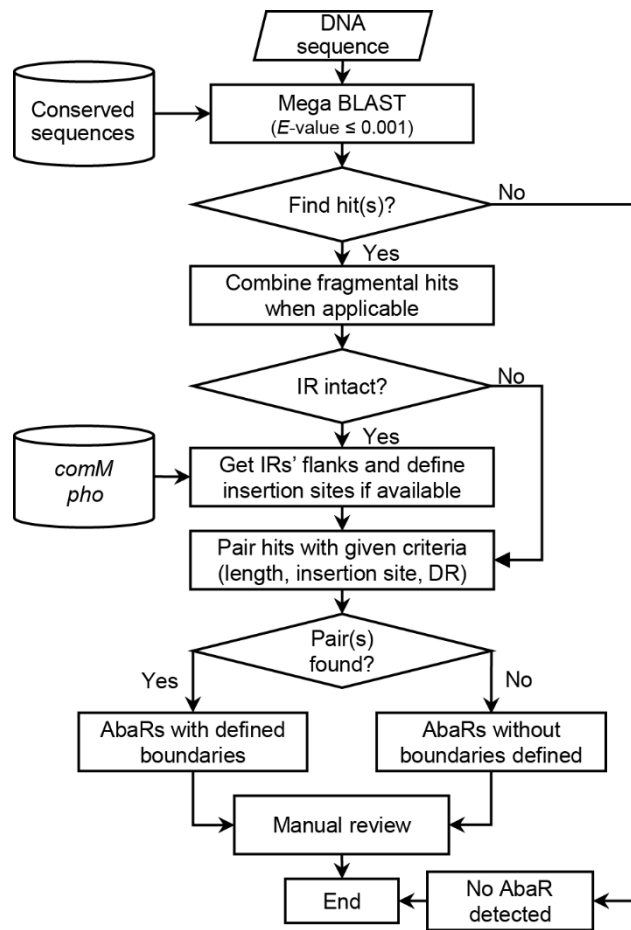

**Figure S1. Flow diagram for *in silico* identification of AbaRs.** IR, inverted repeat; DR, direct repeat.

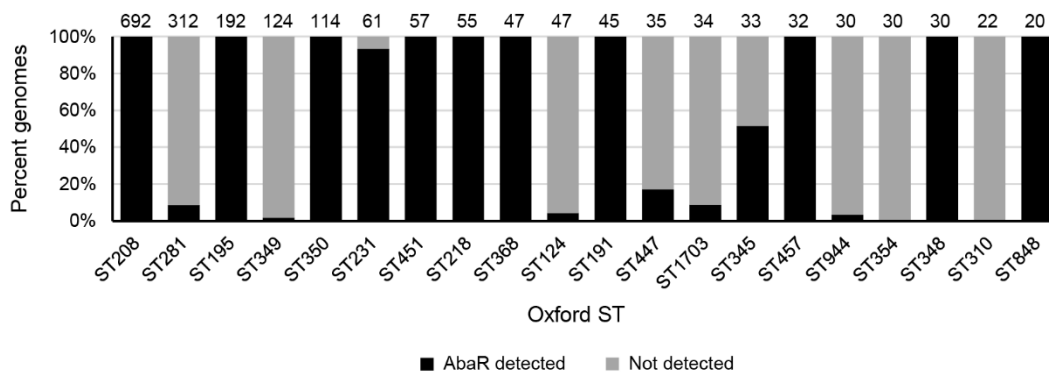

**Figure S2. Abundance of AbaRs in different *Acinetobacter baumannii* sequence types (STs) of the Oxford scheme.** The numbers above the histograms are the numbers of genomes belonging to the corresponding STs. Only STs with top-20 genome numbers are shown. Note that STs could not be determined in many unfinished genomes.

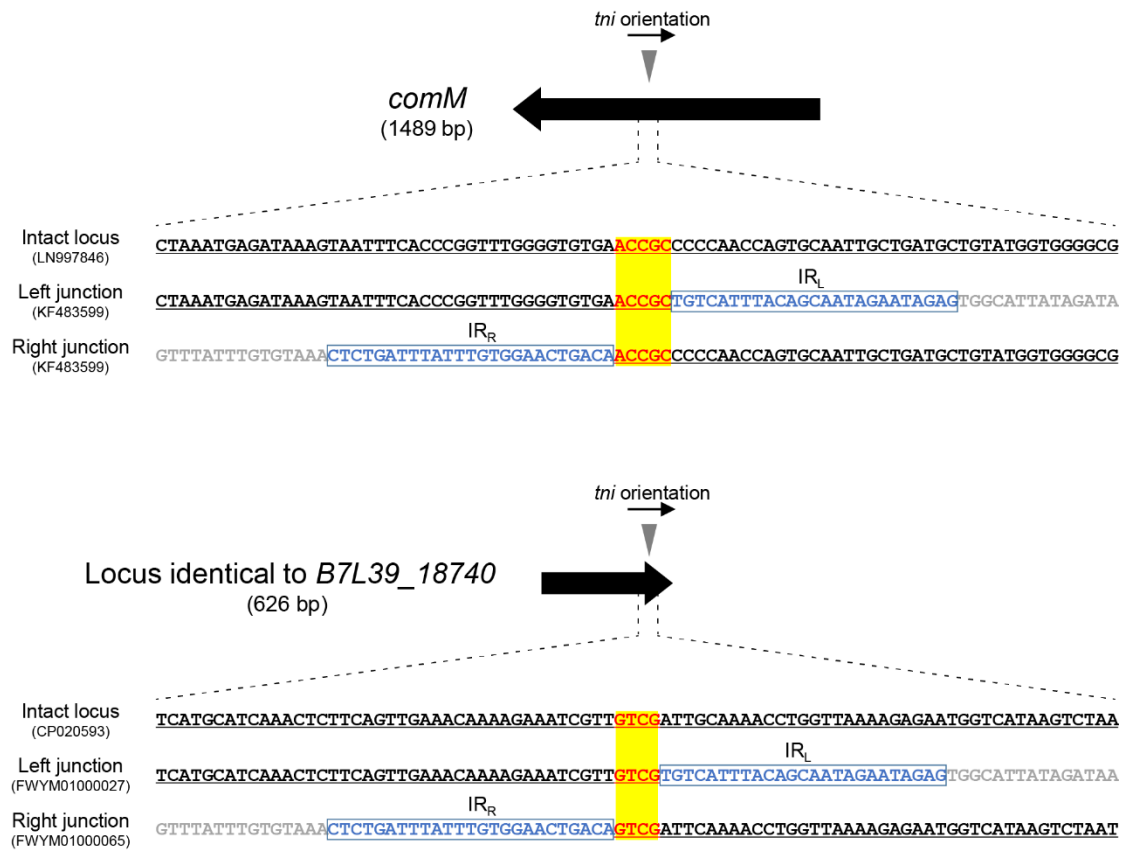

**Figure S3. Examples of target site duplication generated by AbaR insertion.** The *comM* locus is used as a representative sample for the loci with 5-bp target site duplication. The locus identical to *B7L39\_18740* is the one with 4-bp target site duplication. Black bold arrows indicate genes. Grey triangles indicate AbaR insertion positions. Sequences at the insertion positions and the junctions generated by insertion are shown below the genes. Direct repeats (DRs) are indicated in red. Same DRs are connected by yellow. Insertion site sequences (intact or disrupted) are underlined. Inverted repeats (IRs) of AbaRs are indicated in blue and denoted by blue blocks. The sequences in grey are internal AbaR sequences. In the brackets are the GenBank accession numbers for the example sequences.

## References for supplementary materials

1. Post V, White PA, Hall RM. 2010. Evolution of AbaR-type genomic resistance islands in multiply antibiotic-resistant *Acinetobacter baumannii*. *J Antimicrob Chemother* 65:1162-70.
2. Hamidian M, Hall RM. 2011. AbaR4 replaces AbaR3 in a carbapenem-resistant *Acinetobacter baumannii* isolate belonging to global clone 1 from an Australian hospital. *J Antimicrob Chemother* 66:2484-91.
3. Nigro SJ, Hall RM. 2012. Antibiotic resistance islands in A320 (RUH134), the reference strain for *Acinetobacter baumannii* global clone 2. *J Antimicrob Chemother* 67:335-8.
4. Kim DH, Ko KS. 2015. AbaR-type genomic islands in non-*baumannii* *Acinetobacter* species isolates from South Korea. *Antimicrob Agents Chemother* 59:5824-6.
5. Hamidian M, Wynn M, Holt KE, Pickard D, Dougan G, Hall RM. 2014. Identification of a marker for two lineages within the GC1 clone of *Acinetobacter baumannii*. *J Antimicrob Chemother* 69:557-8.
6. Fournier PE, Vallenet D, Barbe V, Audic S, Ogata H, Poirel L, Richet H, Robert C, Mangenot S, Abergel C, Nordmann P, Weissenbach J, Raoult D, Claverie JM. 2006. Comparative genomics of multidrug resistance in *Acinetobacter baumannii*. *PLoS Genet* 2:e7.
7. Iacono M, Villa L, Fortini D, Bordoni R, Imperi F, Bonnal RJ, Sicheritz-Ponten T, De Bellis G, Visca P, Cassone A, Carattoli A. 2008. Whole-genome pyrosequencing of an epidemic multidrug-resistant *Acinetobacter baumannii* strain belonging to the

- European clone II group. *Antimicrob Agents Chemother* 52:2616-25.
8. Adams MD, Goglin K, Molyneaux N, Hujer KM, Lavender H, Jamison JJ, MacDonald IJ, Martin KM, Russo T, Campagnari AA, Hujer AM, Bonomo RA, Gill SR. 2008. Comparative genome sequence analysis of multidrug-resistant *Acinetobacter baumannii*. *J Bacteriol* 190:8053-64.
  9. Hamidian M, Kenyon JJ, Holt KE, Pickard D, Hall RM. 2014. A conjugative plasmid carrying the carbapenem resistance gene *bla<sub>OXA-23</sub>* in AbaR4 in an extensively resistant GC1 *Acinetobacter baumannii* isolate. *J Antimicrob Chemother* 69:2625-8.
  10. Seputiene V, Povilonis J, Suziedeliene E. 2012. Novel variants of AbaR resistance islands with a common backbone in *Acinetobacter baumannii* isolates of European clone II. *Antimicrob Agents Chemother* 56:1969-73.
  11. Post V, Hall RM. 2009. AbaR5, a large multiple-antibiotic resistance region found in *Acinetobacter baumannii*. *Antimicrob Agents Chemother* 53:2667-71.
  12. Post V, Hamidian M, Hall RM. 2012. Antibiotic-resistant *Acinetobacter baumannii* variants belonging to global clone 1. *J Antimicrob Chemother* 67:1039-40.
  13. Adams MD, Chan ER, Molyneaux ND, Bonomo RA. 2010. Genomewide analysis of divergence of antibiotic resistance determinants in closely related isolates of *Acinetobacter baumannii*. *Antimicrob Agents Chemother* 54:3569-77.
  14. Krizova L, Dijkshoorn L, Nemeč A. 2011. Diversity and evolution of AbaR genomic resistance islands in *Acinetobacter baumannii* strains of European clone I. *Antimicrob Agents Chemother* 55:3201-6.
  15. Krizova L, Nemeč A. 2010. A 63 kb genomic resistance island found in a multidrug-

- resistant *Acinetobacter baumannii* isolate of European clone I from 1977. *J Antimicrob Chemother* 65:1915-8.
16. Nigro SJ, Post V, Hall RM. 2011. The multiresistant *Acinetobacter baumannii* European clone I type strain RUH875 (A297) carries a genomic antibiotic resistance island AbaR21, plasmid pRAY and a cluster containing *ISAbal-sul2-CR2-strB-strA*. *J Antimicrob Chemother* 66:1928-30.
  17. Zhou H, Zhang T, Yu D, Pi B, Yang Q, Zhou J, Hu S, Yu Y. 2011. Genomic analysis of the multidrug-resistant *Acinetobacter baumannii* strain MDR-ZJ06 widely spread in China. *Antimicrob Agents Chemother* 55:4506-12.
  18. Holt KE, Hamidian M, Kenyon JJ, Wynn MT, Hawkey J, Pickard D, Hall RM. 2015. Genome Sequence of *Acinetobacter baumannii* Strain A1, an Early Example of Antibiotic-Resistant Global Clone 1. *Genome Announc* 3.
  19. Saule M, Samuelsen O, Dumpis U, Sundsfjord A, Karlson A, Balode A, Miklasevics E, Karah N. 2013. Dissemination of a carbapenem-resistant *Acinetobacter baumannii* strain belonging to international clone II/sequence type 2 and harboring a novel AbaR4-like resistance island in Latvia. *Antimicrob Agents Chemother* 57:1069-72.
  20. Zhu L, Yan Z, Zhang Z, Zhou Q, Zhou J, Wakeland EK, Fang X, Xuan Z, Shen D, Li QZ. 2013. Complete genome analysis of three *Acinetobacter baumannii* clinical isolates in China for insight into the diversification of drug resistance elements. *PLoS One* 8:e66584.
  21. Kochar M, Crosatti M, Harrison EM, Rieck B, Chan J, Constantinidou C, Pallen M, Ou HY, Rajakumar K. 2012. Deletion of *TnAbaR23* results in both expected and

- unexpected antibiogram changes in a multidrug-resistant *Acinetobacter baumannii* strain. *Antimicrob Agents Chemother* 56:1845-53.
22. Nigro SJ, Hall RM. 2012. Tn6167, an antibiotic resistance island in an Australian carbapenem-resistant *Acinetobacter baumannii* GC2, ST92 isolate. *J Antimicrob Chemother* 67:1342-6.
  23. Peters JE, Fricker AD, Kapili BJ, Petassi MT. 2014. Heteromeric transposase elements: generators of genomic islands across diverse bacteria. *Mol Microbiol* 93:1084-92.
  24. Turton JF, Baddal B, Perry C. 2011. Use of the accessory genome for characterization and typing of *Acinetobacter baumannii*. *J Clin Microbiol* 49:1260-6.
  25. Huang H, Yang ZL, Wu XM, Wang Y, Liu YJ, Luo H, Lv X, Gan YR, Song SD, Gao F. 2012. Complete genome sequence of *Acinetobacter baumannii* MDR-TJ and insights into its mechanism of antibiotic resistance. *J Antimicrob Chemother* 67:2825-32.
  26. Liu CC, Tang CY, Kuo HY, Lu CW, Chang KC, Liou ML. 2013. The origin of *Acinetobacter baumannii* TYTH-1: a comparative genomics study. *Int J Antimicrob Agents* 41:318-24.
  27. Hamidian M, Hall RM. 2014. Tn6168, a transposon carrying an IS*Aba1*-activated *ampC* gene and conferring cephalosporin resistance in *Acinetobacter baumannii*. *J Antimicrob Chemother* 69:77-80.
